# Supplementary material for: Pheromone sensing in Drosophila requires support cell-expressed Osiris 8
Source: PubMed Central journal article supplement (PMC9552441; doi:10.1186/s12915-022-01425-w), 2022-10-11
Supplement: 12915_2022_1425_MOESM6_ESM.pdf [file 12915_2022_1425_MOESM6_ESM.pdf]

**Additional file 6: Table S3. *D. melanogaster* strains.**

| <b>Genotype</b>                                           | <b>Reference</b>                |
|-----------------------------------------------------------|---------------------------------|
| <i>Oregon-R-P2</i>                                        | RRID:BDSC_2376                  |
| <i>w<sup>1118</sup></i>                                   | RRID:BDSC_3605                  |
| <i>Canton-S</i>                                           | RRID:BDSC_64349                 |
| <i>ato<sup>1</sup></i>                                    | [122]; RRID:BDSC_25779          |
| <i>Df(3R)p13</i>                                          | RRID:BDSC_1943                  |
| <i>amos<sup>3</sup></i>                                   | [29]                            |
| <i>UAS-mCD8:GFP</i>                                       | RRID:BDSC_5137                  |
| <i>UAS-CD4:tdTomato</i>                                   | RRID:BDSC_35841                 |
| <i>Or67d<sup>Gal4#1</sup></i>                             | [123]                           |
| <i>Or88a-mCD8:GFP</i>                                     | RRID:BDSC_52644                 |
| <i>Or83c-mCD8:GFP</i>                                     | RRID:BDSC_52639                 |
| <i>Or2a-mCD8:GFP</i>                                      | RRID:BDSC_52611                 |
| <i>Or47b-Gal4</i>                                         | RRID:BDSC_9983                  |
| <i>nompA-Gal4</i>                                         | [50, 124]                       |
| <i>ASE5-Gal4</i>                                          | RRID:BDSC_93029                 |
| <i>lush-Gal4</i>                                          | [88]                            |
| <i>Cre (recombinase)</i>                                  | RRID:BDSC_851                   |
| <i>{Act5C-Cas9.P.RFP-}ZH-2A w[118]</i><br><i>Lig[169]</i> | RRID:BDSC_58492                 |
| <i>Osi8<sup>1</sup></i>                                   | <i>This work</i>                |
| <i>Osi8<sup>1-DsRed</sup></i>                             | <i>This work</i>                |
| <i>Osi8-Gal4</i>                                          | <i>This work</i>                |
| <i>UAS-Osi8</i>                                           | <i>This work</i>                |
| <i>UAS-SS:EGFP:Osi8</i>                                   | <i>This work</i>                |
| <i>Act5C-Gal4,UAS-Dcr-2</i>                               | RRID:BDSC_3954, RRID:BDSC_24651 |
| <i>Osi8-15591R-1 (UAS-Osi8<sup>RNAi</sup>) (chr. II)</i>  | NIG-FLY                         |
