# Supplementary material for: Pheromone sensing in Drosophila requires support cell-expressed Osiris 8
Source: PubMed Central journal article supplement (PMC9552441; doi:10.1186/s12915-022-01425-w), 2022-10-11
Supplement: 12915_2022_1425_MOESM7_ESM.pdf [file 12915_2022_1425_MOESM7_ESM.pdf]

**Additional file 7: Table S4. Oligonucleotides.**

| <b>Name</b>             | <b>Use</b>                                       | <b>Sequence</b>                                                                   |
|-------------------------|--------------------------------------------------|-----------------------------------------------------------------------------------|
| sgRNA1/2f               | <i>Osi8</i> sgRNA vector                         | GCGGCCCGGGTTCGATTCCCGGCCGAT<br>GCAGATCAAGTACGTGTGGCATGGTTTT<br>AGAGCTAGAAATAGCAAG |
| sgRNA1/2r               | <i>Osi8</i> sgRNA vector                         | ACAGCGGCTGGAAGCCGGCGTGCACCA<br>GCCGGGAATCGAACCC                                   |
| sgRNA2/3f               | <i>Osi8</i> sgRNA vector                         | CGCCGGCTTCCAGCCGCTGTGTTTTAGA<br>GCTAGAAATAGCAAG                                   |
| sgRNA2/3r               | <i>Osi8</i> sgRNA vector                         | AACAGTCTGAGCTCGGCCCTGCACCA<br>GCCGGGAATCGAACCC                                    |
| sgRNA3/4f               | <i>Osi8</i> sgRNA vector                         | GGGGCCGAGCTCAGACTGTTGTTTTAGA<br>GCTAGAAATAGCAAG                                   |
| sgRNA3/4r               | <i>Osi8</i> sgRNA vector                         | ATTTAACTTGCTATTTCTAGCTCTAAAA<br>CGACCCAGCCGGAATGTCCTTGCACC<br>AGCCGGGAATCGAACCC   |
| HA1f                    | <i>Osi8</i> donor vector                         | CGCCGAATTCGGATCAATAGCCTA                                                          |
| HA1r                    | <i>Osi8</i> donor vector                         | GCGGCCGCGGGACTGTGCTGGGTA                                                          |
| HA2f                    | <i>Osi8</i> donor vector                         | GGCCGCTCTTCGTATGCTCGCATTTGCA<br>TTTGGAA                                           |
| HA2r                    | <i>Osi8</i> donor vector                         | GCGCGCTCTTCGGACTACATGCCTCTGC<br>CTCTGGT                                           |
| Osi8 <sup>1</sup> f     | <i>Osi8</i> <sup>1</sup> validation              | AATTCATCAAGTACGTGTGGCAT                                                           |
| Osi8 <sup>1</sup> r     | <i>Osi8</i> <sup>1</sup> validation              | CTCGAGCAGGCTCTTGGCGCTGCC                                                          |
| Osi8 <sup>1</sup> -HA1f | <i>Osi8</i> <sup>1</sup> validation<br>(control) | CGCCGAATTCGGATCAATAGCCTA                                                          |
| Osi8 <sup>1</sup> -HA1r | <i>Osi8</i> <sup>1</sup> validation<br>(control) | GCGGCCGCGGGACTGTGCTGGGTA                                                          |
| Osi8promf               | <i>Osi8-Gal4</i>                                 | GGATCCTCAAAGACGAAAACCTGG                                                          |
| Osi8promr               | <i>Osi8-Gal4</i>                                 | GAATTCCTTTGGGTGCTCAACTGA                                                          |
| Osi8f                   | <i>UAS-Osi8</i>                                  | GAATTCAGAAGCGCCCGGCGTCAT                                                          |
| Osi8r                   | <i>UAS-Osi8</i>                                  | TCTAGACGGGTAGCAGAATTTACT                                                          |
| Osi8-SSf                | <i>UAS-SS:EGFP:Osi8</i>                          | GAATTCGCCAGCTACCAGCATCAG                                                          |
| Osi8r                   | <i>UAS-SS:EGFP:Osi8</i>                          | TCTAGATCACAGGCTCTTGGCGCT                                                          |
| GstE4f                  | RNA FISH probe                                   | TATCGCTATACGGCCTGGAC                                                              |
| GstE4r                  | RNA FISH probe                                   | CCTCAAGAGCTCCACGAACT                                                              |
| Tsp47Ff                 | RNA FISH probe                                   | GTTCTTGCGGTCCGAGTTTA                                                              |
| Tsp47Fr                 | RNA FISH probe                                   | GATCAGGATGATGGCGTTCT                                                              |
| dvef                    | RNA FISH probe                                   | ACACCGAGGACTTGAACACC                                                              |

|          |                |                            |
|----------|----------------|----------------------------|
| dver     | RNA FISH probe | GGAGGGGCTCTCAAATAAGG       |
| CG13285f | RNA FISH probe | CCGCCGTATTCAGATTGTTT       |
| CG13285r | RNA FISH probe | GATTCCGCTGACCCTGATAA       |
| CG34456f | RNA FISH probe | CAACAAGTGGCTATATAAGATTGCAG |
| CG34456r | RNA FISH probe | TTTGTTTTGATAAATTGAAAGAAAGC |
| CG14153f | RNA FISH probe | GCACTTATGCCCCTGATGAT       |
| CG14153r | RNA FISH probe | AATGGCTCTTGAGGGGATTT       |
| a10f     | RNA FISH probe | ATCGATTGAAAATGGGACA        |
| a10r     | RNA FISH probe | TTGGCCTTGGACTTCATCTC       |
| a5f      | RNA FISH probe | AGCCAGGATAACGACGAGAA       |
| a5r      | RNA FISH probe | CCCATTGCATTAGCAATCCT       |
| CG10357f | RNA FISH probe | ACATGCCGCTTTGCTAGACT       |
| CG10357r | RNA FISH probe | GGGGTTTAACCGCCATCTAT       |
| Jhedupf  | RNA FISH probe | AGCTGTTGCTGTCGGAGATT       |
| Jhedupr  | RNA FISH probe | TTTTGGATCTCCTCCGAATG       |
| Obp59af  | RNA FISH probe | CAACGATGGAGGTCAGTGTG       |
| Obp59ar  | RNA FISH probe | CACAAACCATTCAACGCAAC       |
