# Supplementary material for: Pheromone sensing in Drosophila requires support cell-expressed Osiris 8
Source: PubMed Central journal article supplement (PMC9552441; doi:10.1186/s12915-022-01425-w), 2022-10-11
Supplement: 12915_2022_1425_MOESM8_ESM.pdf [file 12915_2022_1425_MOESM8_ESM.pdf]

**Additional file 8: Table S5. Antibodies.**

| <b>Antibody</b>                      | <b>Dilution</b> | <b>Reference/source</b>       | <b>Identifier</b> |
|--------------------------------------|-----------------|-------------------------------|-------------------|
| anti-DIG-POD                         | 1:300           | Roche Diagnostics AG          | 11 207 733 910    |
| anti-Fluorescein-POD                 | 1:300           | Roche Diagnostics AG          | 11 426 346 910    |
| rabbit-anti-ORCO                     | 1:200           | [24]                          |                   |
| guinea pig-anti IR8a                 | 1:300           | [26]                          | RRID:AB_2566833   |
| rabbit anti-GFP                      | 1:1000          | Invitrogen (Molecular Probes) | A-6455            |
| chicken anti-GFP                     | 1:1000          | Abcam                         | ab13970           |
| Alexa Fluor 488 goat anti-guinea pig | 1:1000          | Invitrogen (Molecular Probes) | A11073            |
| Alexa Fluor 488 goat anti-rabbit     | 1:100           | Invitrogen (Molecular Probes) | A11034            |
| Alexa Fluor 488 goat anti-chicken    | 1:1000          | Abcam                         | ab150169          |
